# Supplementary material
Source: PubMed Central journal article supplement (PMC7190909)

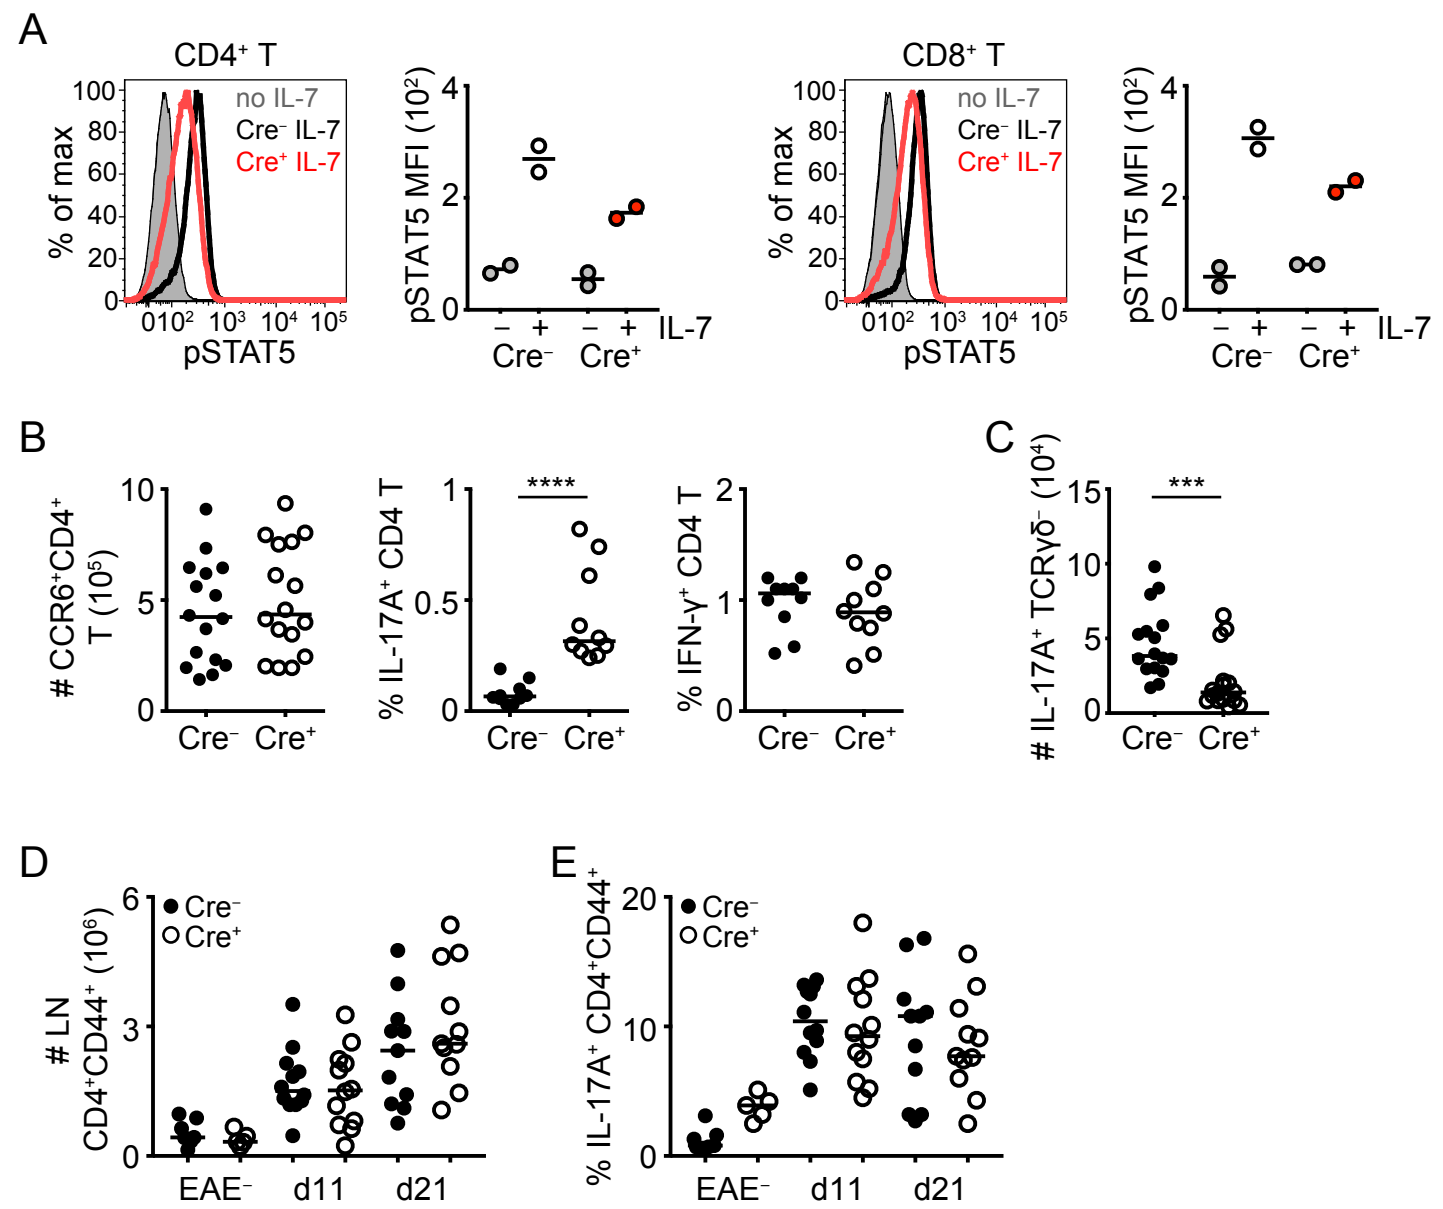

**Supplemental Figure 1. CD4<sup>+</sup>, CD8<sup>+</sup> and non- $\gamma\delta$  innate T cells in ROR $\gamma$ t<sup>Cre</sup>-STAT5<sup>F/F</sup> mice.** Flow cytometric analysis of LN CD4<sup>+</sup>, CD8<sup>+</sup> and non- $\gamma\delta$  T cells in ROR $\gamma$ t<sup>Cre</sup>-STAT5<sup>F/F</sup> (Cre<sup>+</sup>) and littermate control mice (Cre<sup>-</sup>). In graphs each symbol represents a mouse or experiment and line the median. \*\*\* $p < 0.01$ , \*\*\*\* $p < 0.0001$  using Mann-Whitney test. **(A)** Expression of pSTAT5 (histograms) and pSTAT5 mean fluorescent intensity (MFI) in CD4<sup>+</sup> (left) and CD8<sup>+</sup> T cells (right) following a 30 minute stimulation with 20 ng/ml recombinant murine IL-7 (representative of 2 experiments). **(B)** Numbers of CD4<sup>+</sup>CCR6<sup>+</sup> T cells (left), frequency of IL-17A<sup>+</sup> CD4<sup>+</sup> T cells (middle) and frequency of IFN- $\gamma$ <sup>+</sup> CD4<sup>+</sup> T cells (right). **(C)** Number of IL-17A<sup>+</sup> non- $\gamma\delta$  T cells. **(D-E)** Numbers of CD4<sup>+</sup>CD44<sup>+</sup> T cells **(D)** and frequency of IL-17A<sup>+</sup> CD4<sup>+</sup>CD44<sup>+</sup> T cells **(E)** in the LNs of unimmunized control mice (EAE<sup>-</sup>) and mice at days 11 and 21 after MOG-CFA immunization. **(A)**  $n = 2$  experiments (pool of 4-5 mice per experiment); **(B and C)**  $n = 16$  mice, 5 experiments or  $n = 10$ , 3 experiments (cytokines); **(D-E)**  $n = 5-12$  mice, 3 experiments.

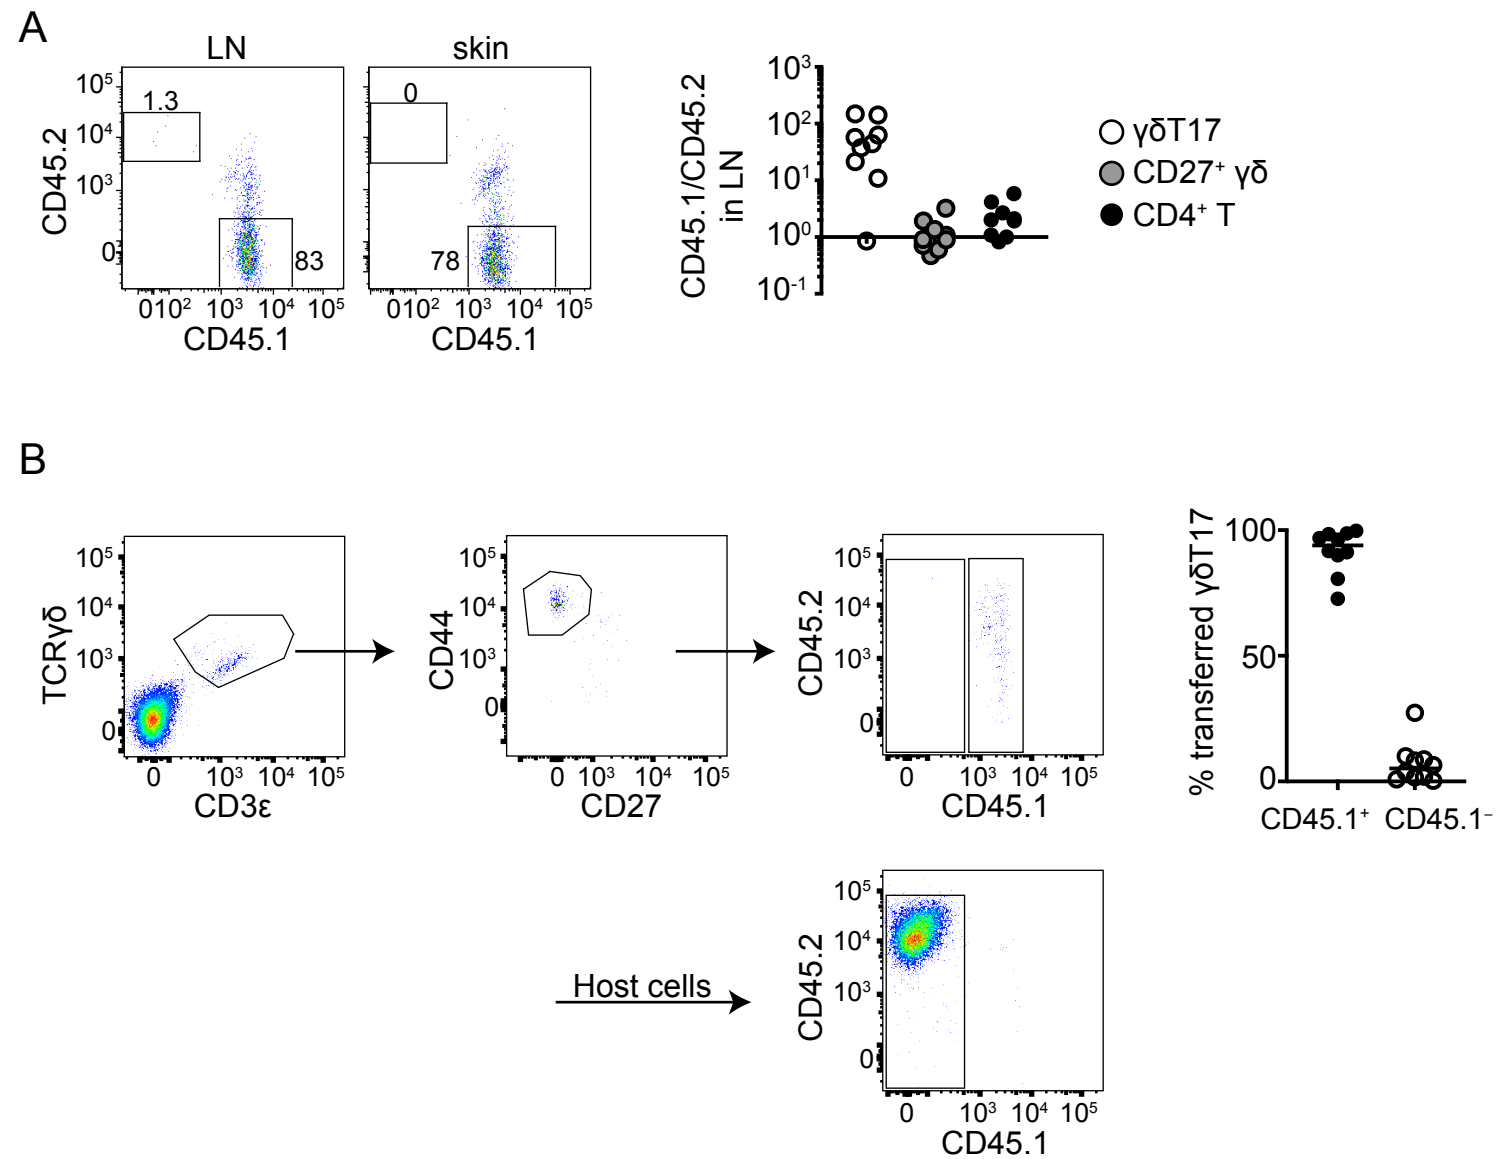

**Supplemental Figure 2. Cell-intrinsic requirement of STAT5 in  $\gamma\delta$ T17 cells.** Flow cytometric analysis of  $\gamma\delta$  T cells after BM or neonatal thymic reconstitution. In graphs, each symbol represents a mouse and line the median. **(A)** Dot plots: frequency of CD45.1<sup>+</sup> (wild-type) and CD45.2<sup>+</sup> (STAT5-deficient)  $\gamma\delta$ T17 cells from mixed BM chimera hosts (CD45.1<sup>+</sup>CD45.2<sup>+</sup>) in the LN and skin; graph shows the ratio of CD45.1<sup>+</sup>/CD45.2<sup>+</sup> cells in the LN (each symbol represents a mouse); total of 9 chimeras. **(B)** Upper panel dot plots: frequency of CD45.1<sup>+</sup> (wild-type) and CD45.1<sup>-</sup> (STAT5-deficient)  $\gamma\delta$ T17 cells in the LN of RAG1 mice reconstituted 3 weeks earlier with neonatal thymic  $\gamma\delta$  T cells. Lower panel dot plot indicates CD45.1 and CD45.2 in host cells; n = 10 mice, 2 experiments.

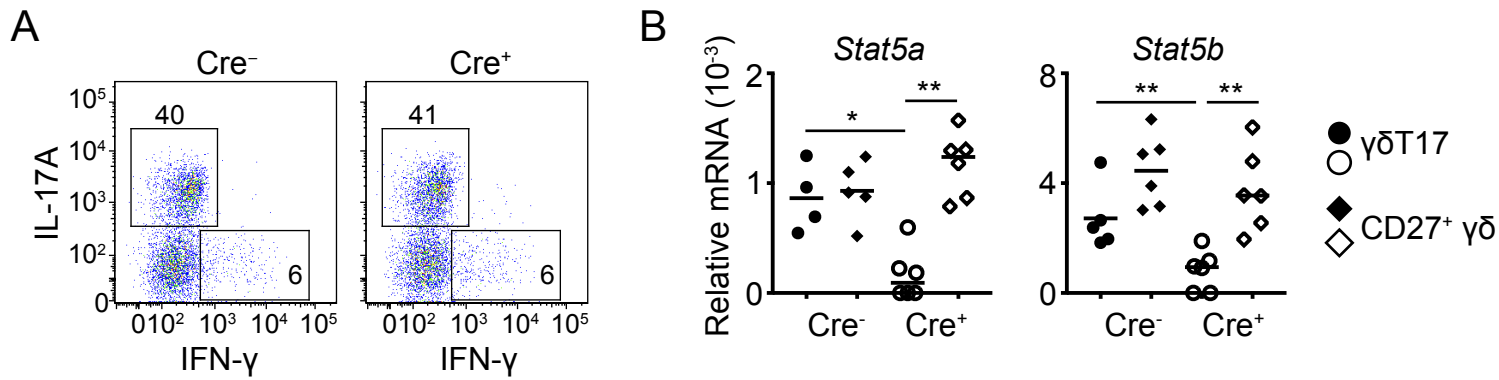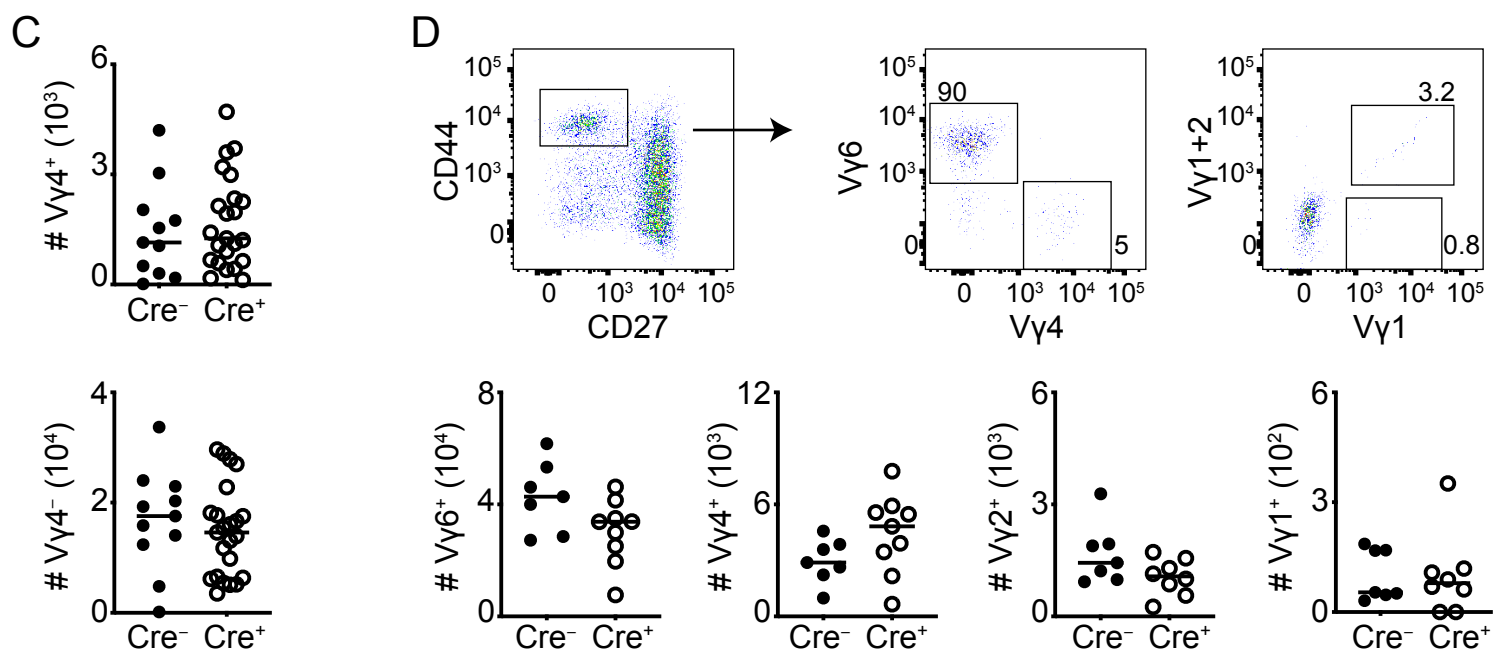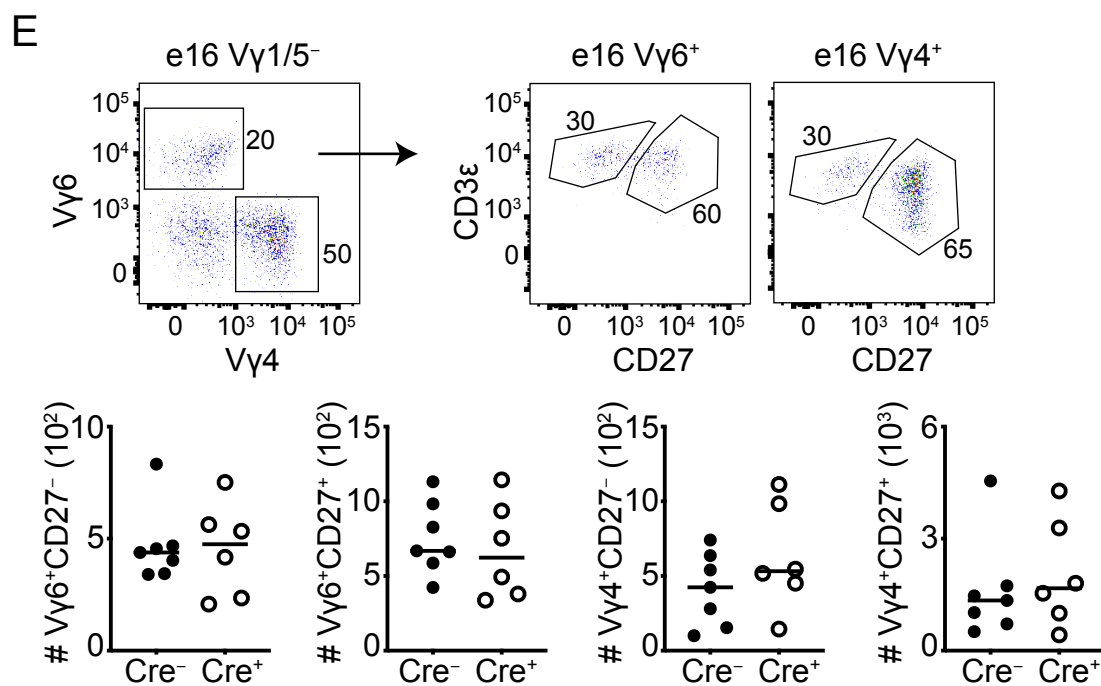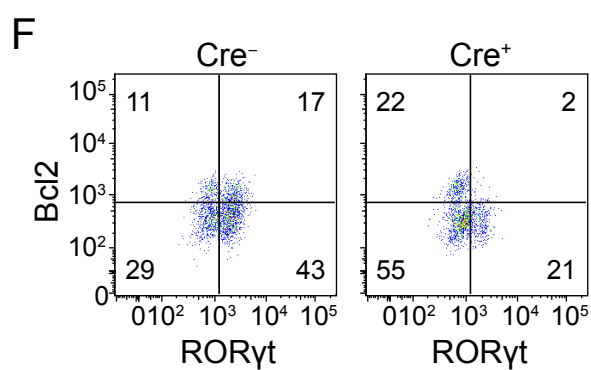

**Supplemental Figure 3. Impact of STAT5 during embryonic and neonatal  $\gamma\delta$ T17 cell development.** Flow cytometric analysis of  $\gamma\delta$  T cells in ROR $\gamma$ t<sup>CRE</sup>-STAT5<sup>F/F</sup> (Cre<sup>+</sup>) and littermate control mice (Cre<sup>-</sup>). In graphs, each symbol represents a mouse and line the median. \*p < 0.05, \*\*p < 0.01 using Mann-Whitney test. **(A)** Expression of IL-17A and IFN- $\gamma$  in thymic  $\gamma\delta$  T cells one day after birth (representative of two litters with 2-5 pups per genotype per litter). **(B)** Expression of *Stat5a* and *Stat5b* in sorted thymic CD27<sup>-</sup>CD44<sup>+</sup>CCR6<sup>+</sup> ( $\gamma\delta$ T17) and CD27<sup>+</sup>  $\gamma\delta$  T cells one day after birth. **(C)** Numbers of V $\gamma$ 4<sup>+</sup> and V $\gamma$ 4<sup>-</sup> d2 thymic  $\gamma\delta$ T17 cells. **(D)** Expression of the indicated V $\gamma$  chains in d2  $\gamma\delta$ T17 cells and numbers of V $\gamma$ 6<sup>-</sup>, V $\gamma$ 4<sup>-</sup>, V $\gamma$ 2<sup>-</sup> and V $\gamma$ 1<sup>-</sup>-expressing cells  $\gamma\delta$ T17. **(E)** Expression of V $\gamma$ 6/V $\gamma$ 4 and CD27/CD3 in V $\gamma$ 5<sup>-</sup>V $\gamma$ 1<sup>-</sup>  $\gamma\delta$  T cells at embryonic day e16 in the thymus and numbers of V $\gamma$ 6<sup>-</sup> and V $\gamma$ 4<sup>-</sup>-expressing  $\gamma\delta$  T cells. **(F)** Expression of BCL2 and ROR $\gamma$ t in  $\gamma\delta$  T cells from LN of day 7 old mice (numbers indicate percent of expression; representative of two litters with 3-5 pups per genotype per litter). **(B)** n = 4-6 mice, 2 experiments (sorts); **(C)** n = 11 (d2) and 9 (d7) Cre<sup>-</sup> mice and 23 (d2) and 12 (d7) Cre<sup>+</sup> mice, 3 experiments; **(D)** n = 7 Cre<sup>-</sup> mice and 9 Cre<sup>+</sup> mice, 3 experiments; **(E)** n = 7 Cre<sup>-</sup> mice and 6 Cre<sup>+</sup> mice, 2 experiments.

A

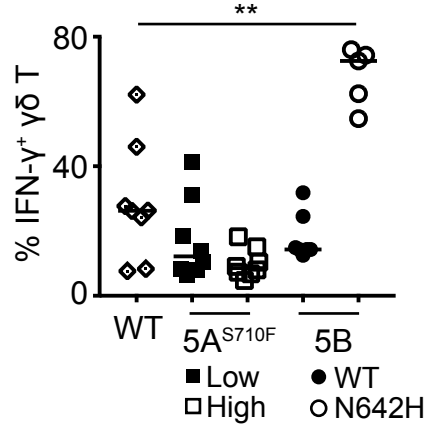

B

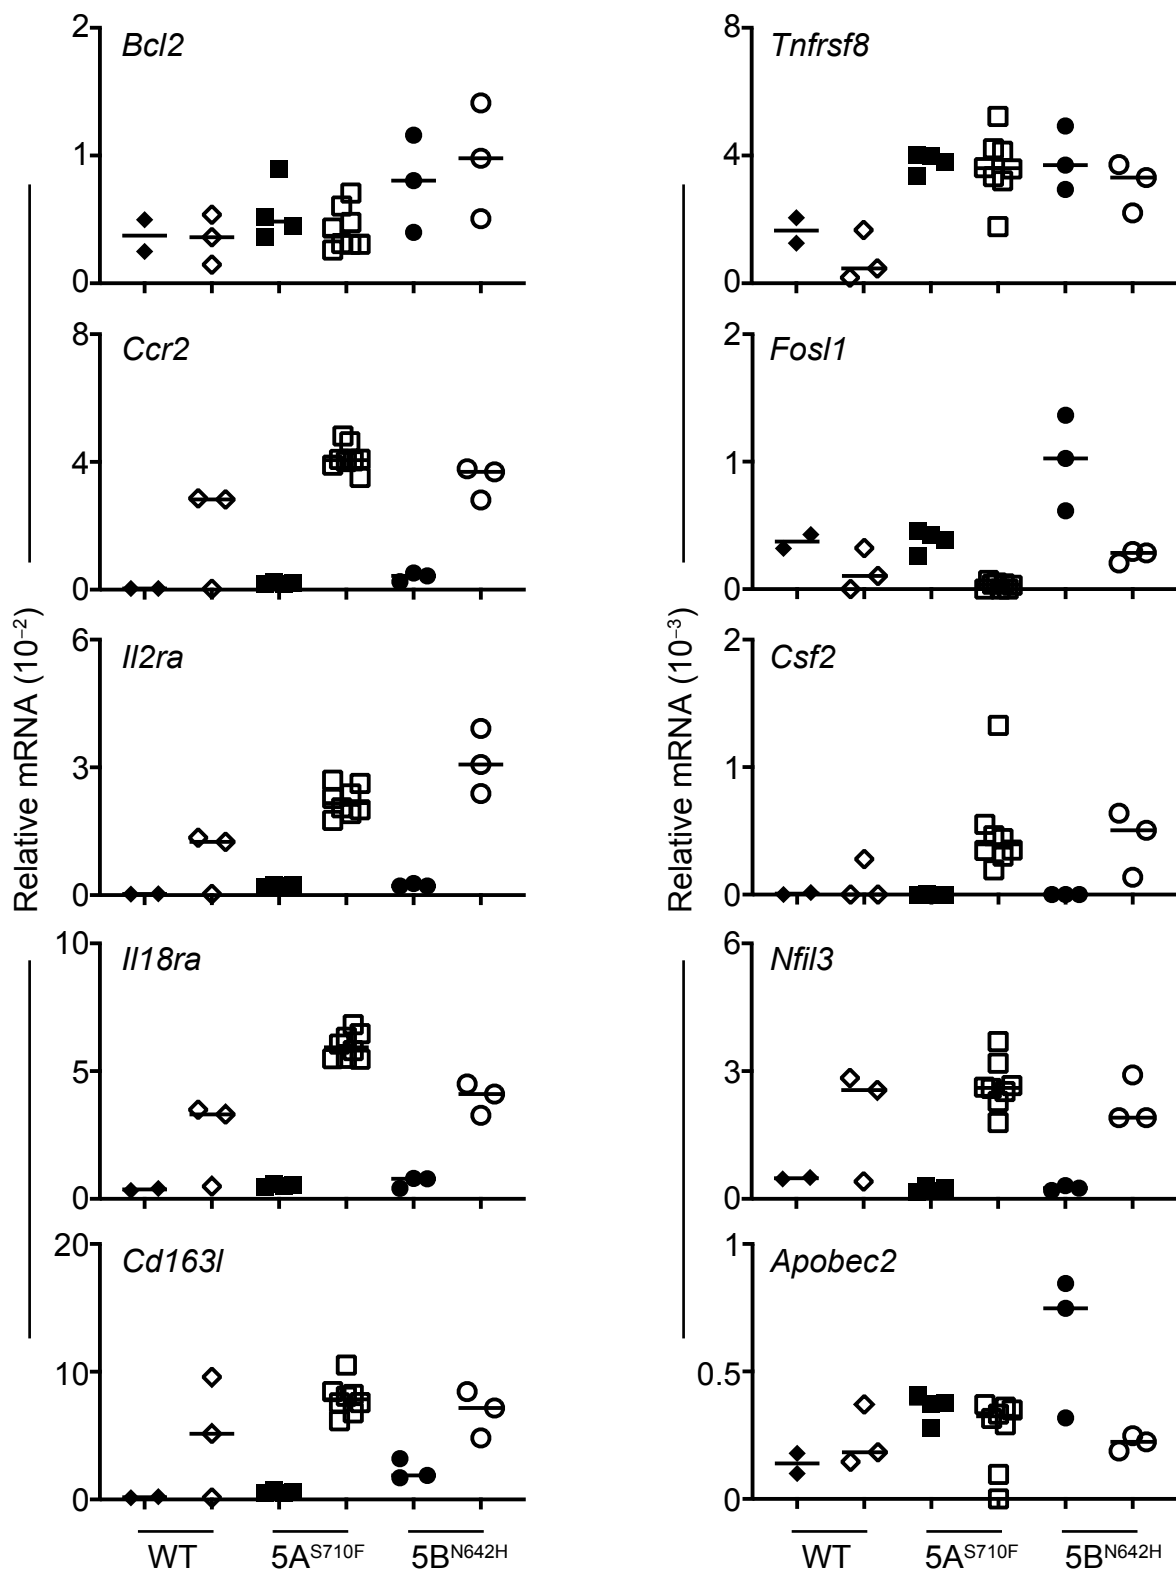CD27<sup>+</sup>  $\gamma\delta$ : closed symbols $\gamma\delta$ T17: open symbols

**Supplemental Figure 4. Impact of hyperactive *STAT5A* and *STAT5B* in  $\gamma\delta$  T cells.** Flow cytometric and gene expression analysis of  $\gamma\delta$  T cells in *STAT5A* and *STAT5B* hyperactive mutant mice as described in Figure 2. \*\* $p < 0.01$  using Mann-Whitney test (A) Expression of IFN- $\gamma$  within the LN  $\gamma\delta$  T cell compartment of the indicated *STAT5A* and *STAT5B* hyperactive mutant mice or WT control mice. (B) Expression of the indicated *STAT5A/B* target genes in sorted CD27<sup>-</sup>CD44<sup>+</sup>CCR6<sup>+</sup> ( $\gamma\delta$ T17) and CD27<sup>+</sup>  $\gamma\delta$  T cells from *STAT5A*S710F<sup>High</sup> (n = 4-8), *STAT5B*N642H (n = 3-4) and WT (n = 2) mice.

**A**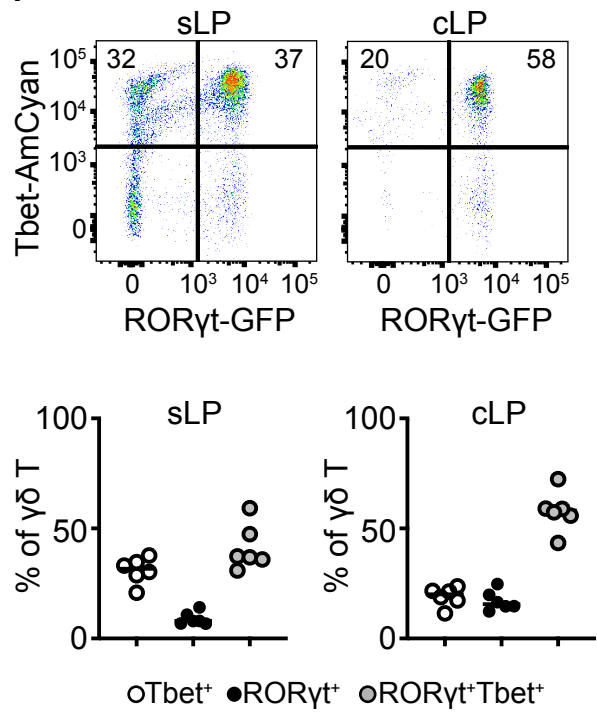**B**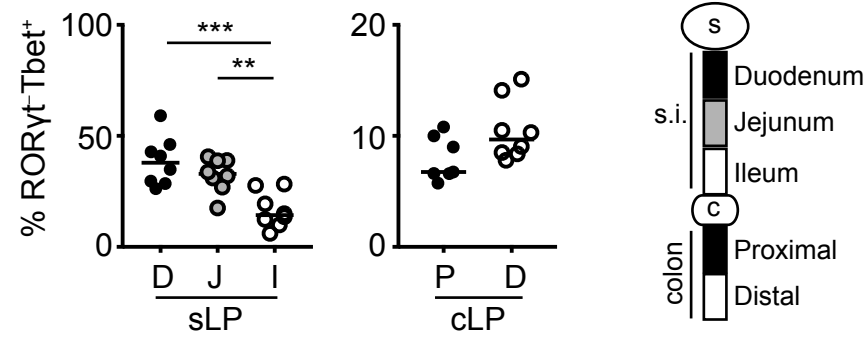**C**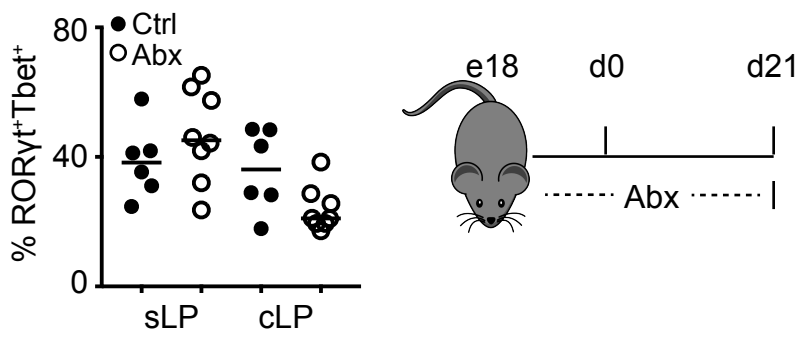**D**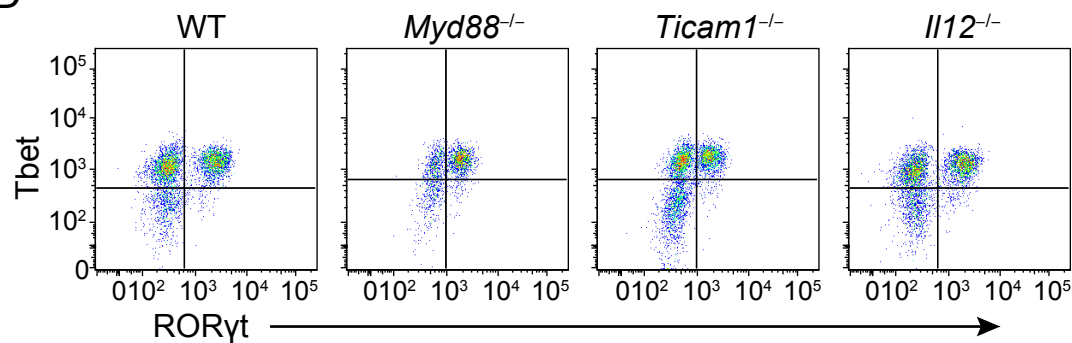

**Supplemental Figure 5. Characterization of a novel Tbet<sup>+</sup>  $\gamma\delta$ T17 population in the intestinal lamina propria at steady-state.** Flow cytometric analysis of intestinal  $\gamma\delta$  T cells from the indicated treatments and mouse strains. In graphs each symbol represents a mouse and line the median. \*\*p < 0.01, \*\*\*p < 0.001, using Mann-Whitney test. **(A)** Dot plots: expression of AmyCyan and GFP in cLP and sLP  $\gamma\delta$  T cells from double transgenic mice reporting AmCyan under the control of the Tbet promoter and GFP under the control of the ROR $\gamma$ t promoter; Graphs: frequency of ROR $\gamma$ t<sup>+</sup>Tbet<sup>+</sup>, ROR $\gamma$ t<sup>+</sup> and Tbet<sup>+</sup>  $\gamma\delta$  T cells in the sLP and cLP using the double-reporter. **(B)** Frequency of ROR $\gamma$ t<sup>-</sup>Tbet<sup>+</sup> cells within the  $\gamma\delta$  T cell compartment in the indicated small intestinal and colonic segments of WT C57BL/6 mice. **(C)** E18 pregnant mice were treated with an antibiotics (Abx) cocktail (see Methods) in the drinking water until their pups were analyzed at 21 days old. Graph shows the frequency of ROR $\gamma$ t<sup>+</sup>Tbet<sup>+</sup> cells within the sLP and cLP  $\gamma\delta$  T cell compartment in these pups. **(D)** Expression of ROR $\gamma$ t and Tbet in the cLP  $\gamma\delta$  T cell compartment in the indicated knockout mouse strains. **(A)** n = 6 mice, 2 experiments; **(B)** n = 8 mice, 4 experiments; **(C)** n = 6-8 mice, 2 experiments; **(D)** n = 2-4 mice per strain.



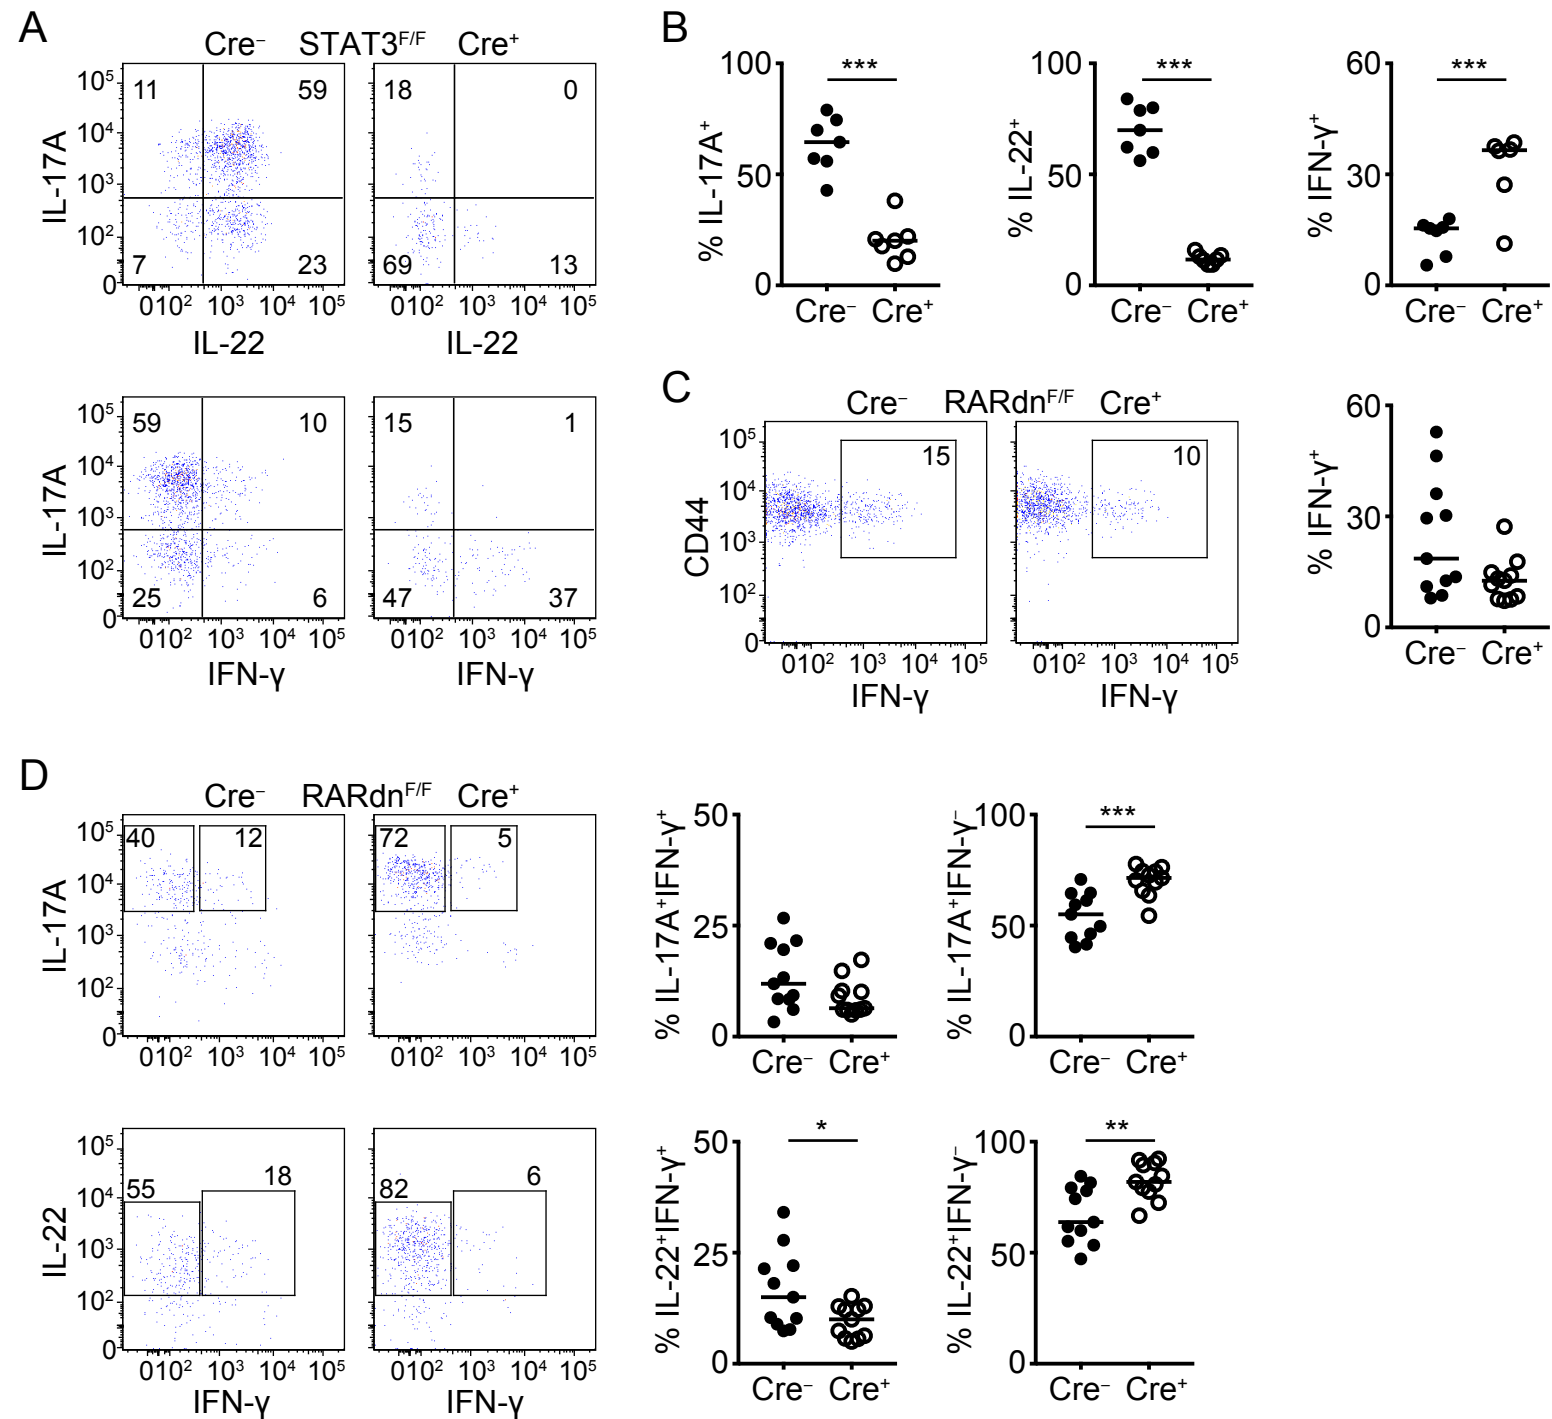

**Supplemental Figure 6. STAT3 and retinoic acid receptor signaling regulate cytokine production in intestinal  $\gamma\delta$ T17 cells.** Flow cytometric analysis of small intestinal  $\gamma\delta$  T cells in ROR $\gamma$ t<sup>CRE</sup>-STAT3<sup>F/F</sup> or ROR $\gamma$ t<sup>CRE</sup>-RARdn<sup>F/F</sup> (Cre<sup>+</sup>) and littermate control mice (Cre<sup>-</sup>) following IL-23 stimulation. In graphs each symbol represents a mouse and line the median. \**p* < 0.05, \*\**p* < 0.01, \*\*\**p* < 0.001 using Mann-Whitney test. **(A)** Expression of IL-17A and IL-22 (top) or IL-17A and IFN- $\gamma$  (bottom) in ROR $\gamma$ t<sup>CRE</sup>-STAT3<sup>F/F</sup> (Cre<sup>+</sup>) and littermate control mice (Cre<sup>-</sup>). Numbers indicate percent of positive expression. **(B)** Frequency of IL-17A<sup>+</sup>, IL-22<sup>+</sup> and IFN- $\gamma$ <sup>+</sup>  $\gamma\delta$  T cells in ROR $\gamma$ t<sup>CRE</sup>-STAT3<sup>F/F</sup> (Cre<sup>+</sup>) and littermate control mice (Cre<sup>-</sup>). **(C)** Expression of CD44 and IFN- $\gamma$  (dot plots) and frequency of IFN- $\gamma$ <sup>+</sup>  $\gamma\delta$  T cells (graph) in ROR $\gamma$ t<sup>CRE</sup>-RARdn<sup>F/F</sup> (Cre<sup>+</sup>) and littermate control mice (Cre<sup>-</sup>). **(D)** Expression of IL-17A and IFN- $\gamma$  (top dot plots) or IL-22 and IFN- $\gamma$  (bottom dot plots) with graphical representation of the frequency of IL-17A<sup>+</sup>IFN- $\gamma$ <sup>+</sup> and IL-17A<sup>+</sup>IFN- $\gamma$ <sup>-</sup> or IL-22<sup>+</sup>IFN- $\gamma$ <sup>+</sup> and IL-22<sup>+</sup>IFN- $\gamma$ <sup>-</sup>  $\gamma\delta$  T cells in ROR $\gamma$ t<sup>CRE</sup>-RARdn<sup>F/F</sup> (Cre<sup>+</sup>) and littermate control mice (Cre<sup>-</sup>). **(A-B)** *n* = 7 mice, 2 experiments; **(C-D)** *n* = 11 mice, 5 experiments.

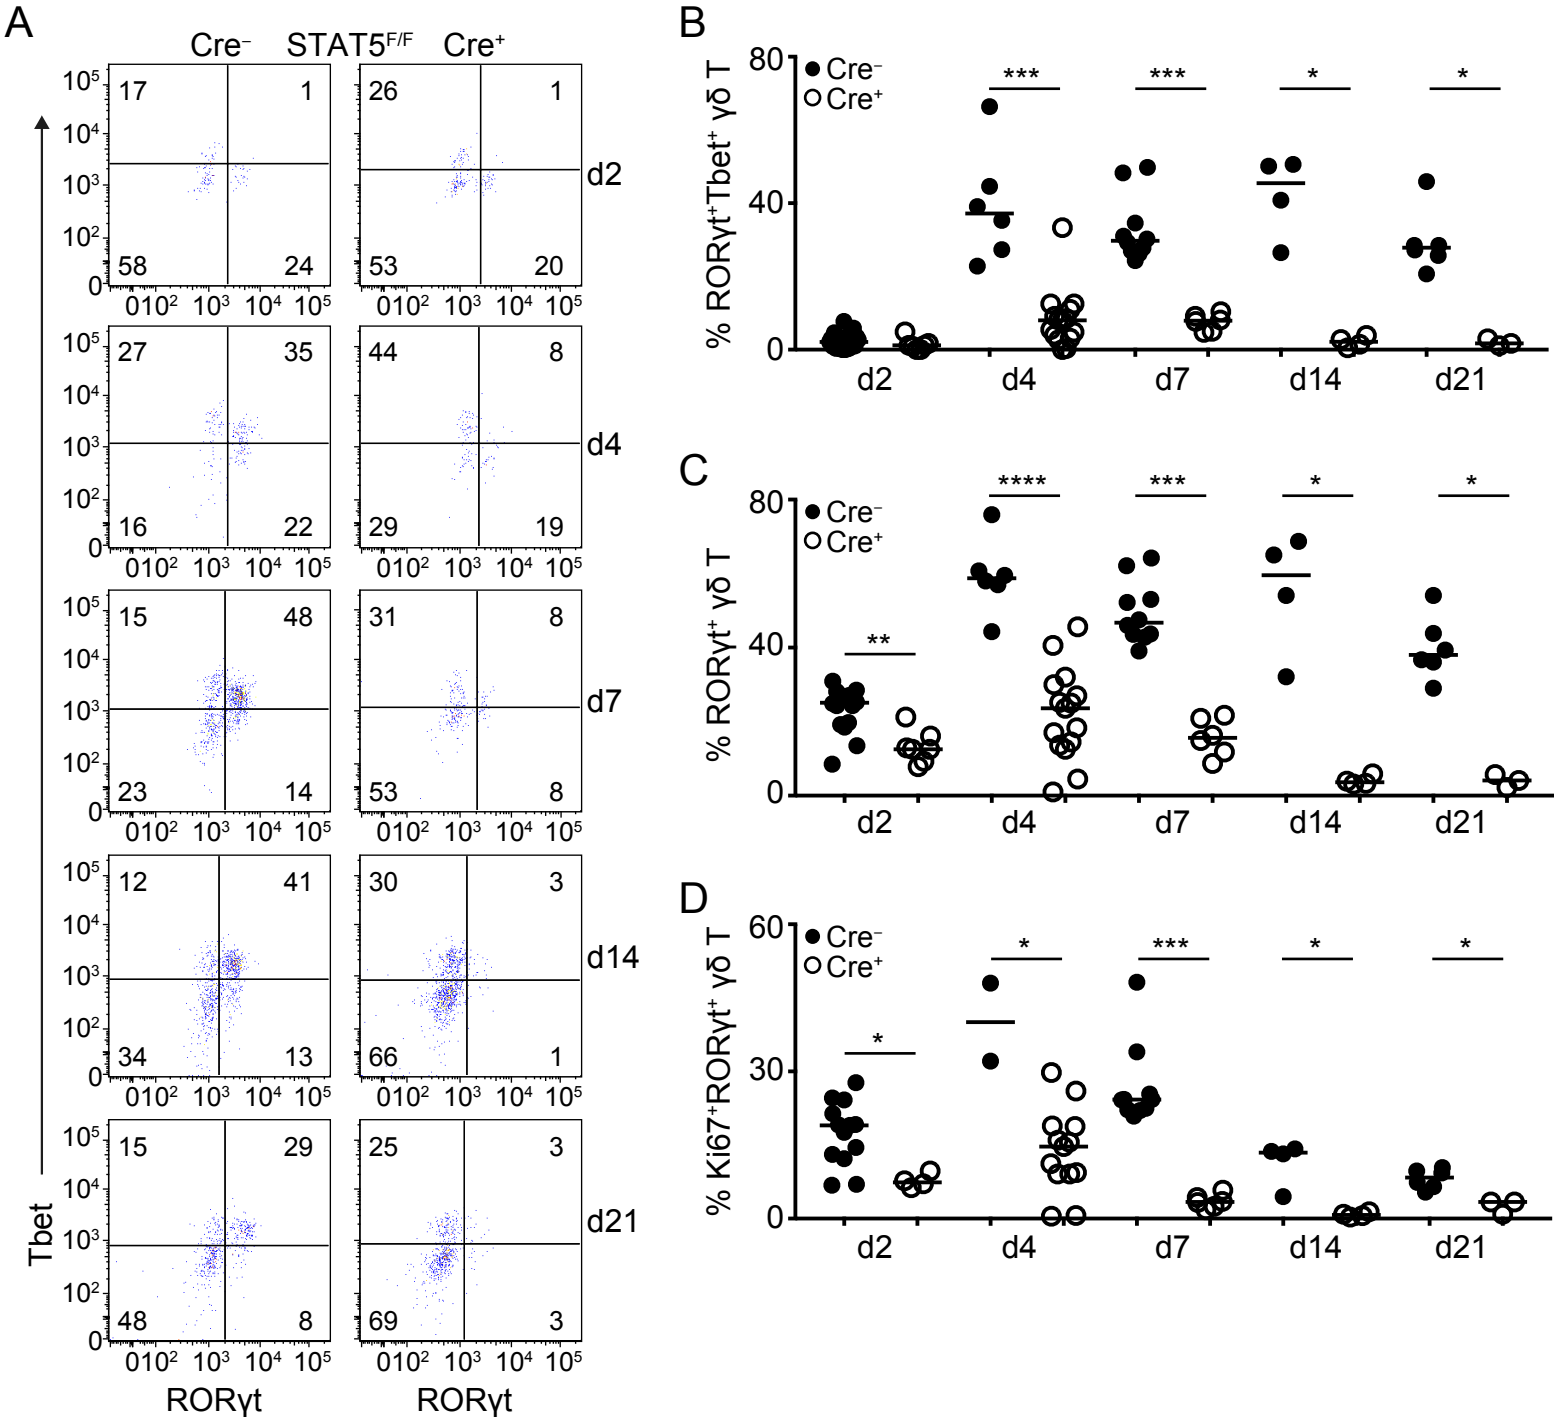

**Supplemental Figure 7. STAT5 regulates the neonatal fate of intestinal Tbet<sup>+</sup>  $\gamma\delta$ T17 cells.** Flow cytometric analysis of small intestinal  $\gamma\delta$  T cells in RORyt<sup>CRE</sup>-STAT5<sup>F/F</sup> (Cre<sup>+</sup>) and littermate control mice (Cre<sup>-</sup>) during neonatal ontogeny. Day of birth is counted as day(d)1. In graphs each symbol represents a mouse and line the median. \* $p < 0.05$ , \*\* $p < 0.01$ , \*\*\* $p < 0.001$ , \*\*\*\* $p < 0.0001$  using Mann-Whitney test. **(A)** Expression of RORyt and Tbet within the  $\gamma\delta$  T cell compartment of sLP at the indicated days after birth. Numbers indicate percent of RORyt and Tbet expression. **(B)** Frequency of sLP RORyt<sup>+</sup>Tbet<sup>+</sup>  $\gamma\delta$  T cells at the indicated days after birth. **(C)** Frequency of sLP RORyt<sup>+</sup>  $\gamma\delta$  T cells (including Tbet<sup>+</sup>) at the indicated days after birth. **(D)** Frequency of sLP Ki67<sup>+</sup>RORyt<sup>+</sup>  $\gamma\delta$  T cells at the indicated days after birth. **(A-D)** = 2-16 mice from at least 5 different litters.

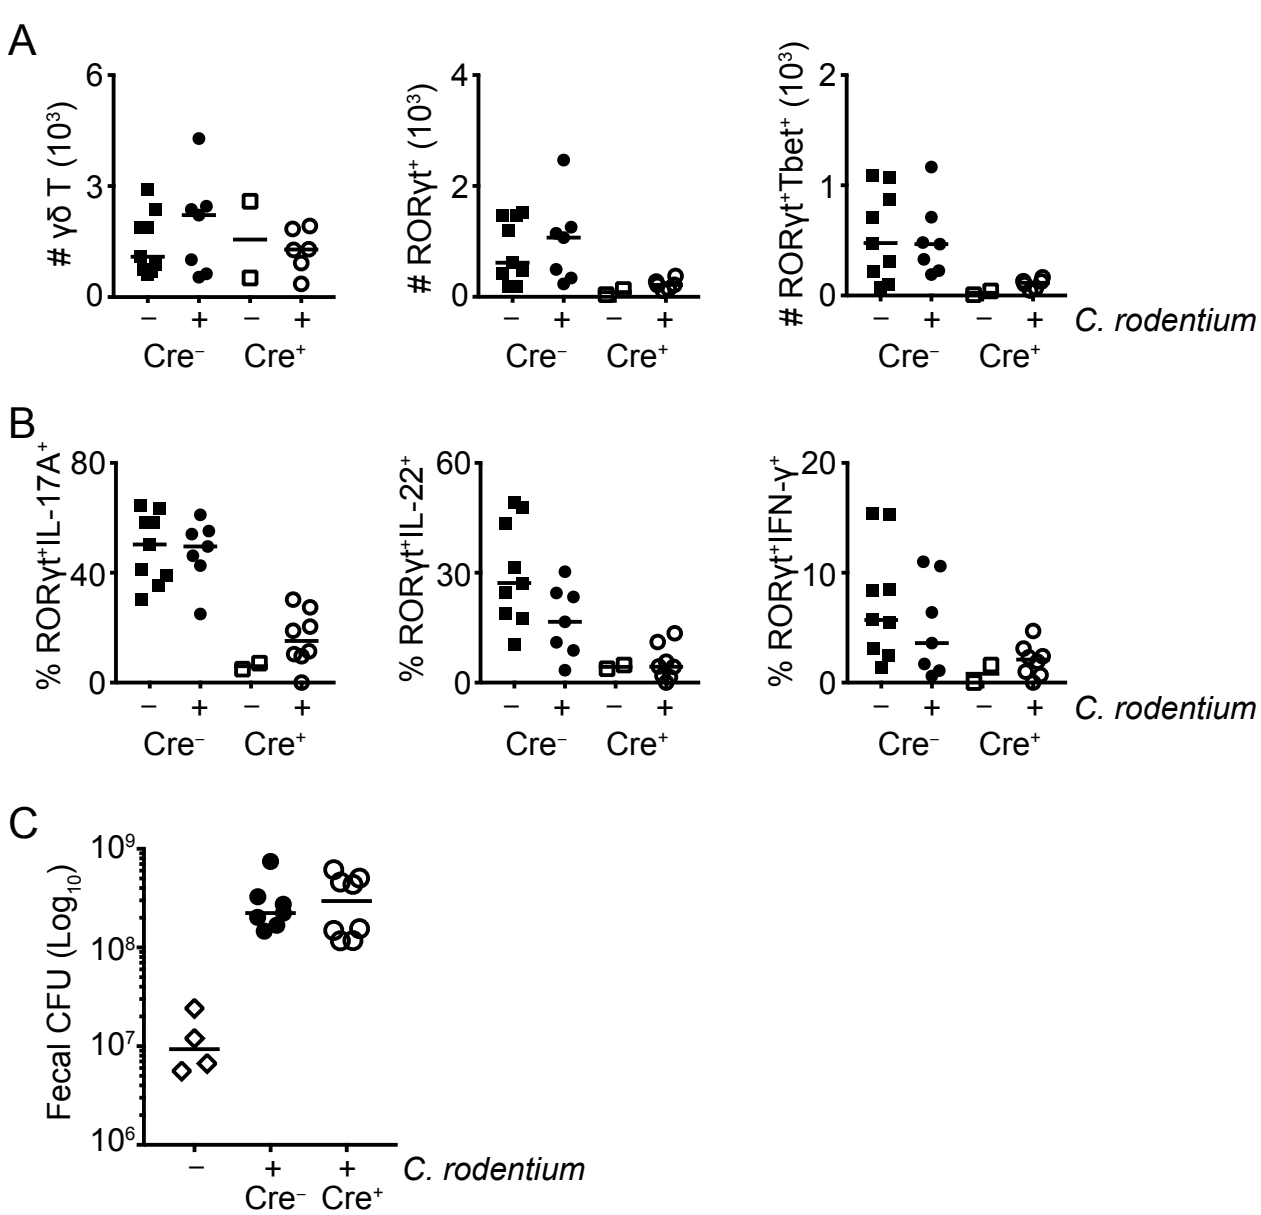

Supplement: jci-130-131241-s287.pdf [file jci-130-131241-s287.pdf]
